# Supplementary material
Source: publisher site journal article supplement (https://www.dovepress.com/article/469503)
Supplement: Supplementary file 1 [file get_supplementary_file.php]

Table S1. Distribution and positive test rates of common sources of allergens.

| **Sources of allergens** | | Negative (Level 0) | Positive | | | | | |  |
| --- | --- | --- | --- | --- | --- | --- | --- | --- | --- |
| Level 1 | Level 2 | Level 3 | Level 4 | Level 5 | Level 6 | positive test rates (%) |
| Inhaled | *Dermatophagoides pteronyssinus* | 2319(80.27%) | 121 | 167 | 121 | 92 | 46 | 23 | 570(19.73%) |
|  | *Dermatophagoides farinae* | 2259(78.19%) | 107 | 156 | 122 | 88 | 71 | 86 | 630(21.81%) |
|  | Dog dander | 2324(91.68%) | 30 | 74 | 70 | 22 | 6 | 9 | 211(8.32%) |
|  | Cat dander | 2349(92.66%) | 58 | 82 | 34 | 10 | 1 | 1 | 186(7.34%) |
|  | *Blattella germanica* | 2478(96.50%) | 46 | 37 | 5 | 1 | 1 | 0 | 90(3.5%) |
|  | Mixed dust mite | 2305(75.43%) | 123 | 194 | 160 | 121 | 80 | 73 | 751(24.57%) |
|  | Mixed molds | 4753(76.80%) | 161 | 332 | 609 | 294 | 39 | 1 | 1436(23.2%) |
|  | Mixed animal fur | 2669(86.38%) | 131 | 173 | 84 | 30 | 3 | 0 | 421(13.62%) |
|  | Mixed grasses | 2582(83.56%) | 113 | 183 | 135 | 48 | 17 | 12 | 508(16.44%) |
|  | Mixed trees | 2646(85.63%) | 125 | 184 | 100 | 33 | 2 | 0 | 444(14.37%) |
|  | Phadiatop | 2906(86.26%) | 98 | 169 | 106 | 51 | 30 | 9 | 463(13.74%) |
| Food | Egg white | 6200(69.17%) | 839 | 1221 | 548 | 122 | 22 | 12 | 2764(30.83%) |
|  | Milk | 6367(71.03%) | 930 | 1216 | 366 | 70 | 9 | 6 | 2597(28.97%) |
|  | Wheat | 7515(83.84%) | 533 | 643 | 201 | 50 | 16 | 6 | 1449(16.16%) |
|  | Soybean | 8093(90.28%) | 297 | 379 | 152 | 33 | 8 | 2 | 871(9.72%) |
|  | Peanut | 8403(93.74%) | 210 | 277 | 64 | 10 | 0 | 0 | 561(6.26%) |
|  | Crab | 5010(98.68%) | 24 | 28 | 9 | 4 | 1 | 1 | 67(1.32%) |
|  | Shrimp | 7994(97.75%) | 82 | 71 | 20 | 8 | 2 | 1 | 184(2.25%) |
|  | Sesame | 4386(86.39%) | 205 | 322 | 129 | 27 | 6 | 2 | 691(13.61%) |
|  | Mixed food | 5190(57.90%) | 1174 | 1793 | 653 | 117 | 28 | 9 | 3774(42.1%) |

**Notes:** Phadiatop is not a natural source of allergens, but a mixture of several different inhaled allergens. More than 90% of common allergens in the air are embedded in the same CAP and determined by CAP system.

Table S2. Age difference of positive rates (%).

| **Sources of allergens** | **Number of sIgE-positive patients(%)** | | | | | **χ2** | ***p* value** |
| --- | --- | --- | --- | --- | --- | --- | --- |
| **0~1 years** | **>1~3 years** | **>3~6 years** | **>6~12 years** | **>12~18 years** |
| *Dermatophagoides pteronyssinus* | 0 | 51(8.21%) | 238(22.31%) | 265(38.46%) | 16(43.24%) | 305.15 | <0.001*** |
| *Dermatophagoides farinae* | 6(1.43%) | 54(8.72%) | 269(25.12%) | 286(41.45%) | 17(45.95%) | 334.18 | <0.001*** |
| Dog dander | 3(1.14%) | 20(3.62%) | 69(6.67%) | 113(17.68%) | 6(19.35%) | 115.096 | <0.001*** |
| Cat dander | 10(3.86%) | 27(4.92%) | 67(6.52%) | 83(13.15%) | 2(6.90%) | 40.363 | <0.001*** |
| *Blattella germanica* | 6(2.24%) | 16(2.86%) | 39(3.75%) | 30(4.67%) | 4(13.33%) | 12.077 | 0.017* |
| Mixed dust mite | 4(1.39%) | 62(9.94%) | 322(25.91%) | 350(43.91%) | 18(42.86%) | 318.693 | <0.001*** |
| Mixed molds | 33(2.09%) | 303(19.19%) | 691(39.53%) | 407(35.03%) | 13(20.63%) | 753.86 | <0.001*** |
| Mixed animal fur | 26(9.12%) | 85(13.78%) | 161(12.91%) | 147(18.08%) | 8(20.00%) | 18.95 | 0.001** |
| Mixed grasses | 3(1.03%) | 39(6.11%) | 245(19.54%) | 218(27.11%) | 15(36.59%) | 180.086 | <0.001*** |
| Mixed trees | 2(0.68%) | 42(6.58%) | 207(16.56%) | 190(23.63%) | 10(24.39%) | 135.455 | <0.001*** |
| Phadiatop | 30(2.08%) | 145(14.30%) | 150(30.99%) | 132(39.17%) | 9(42.86%) | 475.259 | <0.001*** |
| Egg white | 1260(37.95%) | 914(41.23%) | 521(28.99%) | 110(9.50%) | 1(1.69%) | 434.257 | <0.001*** |
| Milk | 835(25.55%) | 1111(50.41%) | 571(31.56%) | 133(11.31%) | 2(3.39%) | 666.209 | <0.001*** |
| Wheat | 585(17.45%) | 368(16.28%) | 341(18.43%) | 177(15.27%) | 5(8.77%) | 9.191 | 0.056 |
| Soybean | 146(4.29%) | 132(5.71%) | 160(8.47%) | 133(11.18%) | 5(8.33%) | 84.681 | <0.001*** |
| Peanut | 196(5.77%) | 214(9.32%) | 272(14.45%) | 194(16.48%) | 8(13.56%) | 165.505 | <0.001*** |
| Crab | 5(0.26%) | 24(1.97%) | 27(2.27%) | 17(2.53%) | 3(10.71%) | 47.731 | <0.001*** |
| Shrimp | 21(0.65%) | 55(2.54%) | 58(3.52%) | 49(4.85%) | 8(17.02%) | 122.306 | <0.001*** |
| Sesame | 144(7.47%) | 162(13.44%) | 231(19.76%) | 159(24.02%) | 6(21.43%) | 156.555 | <0.001*** |
| Mixed food | 1426(43.66%) | 1245(57.03%) | 812(46.29%) | 335(29.52%) | 10(17.54%) | 256.749 | <0.001*** |

**Notes:** Chi-square test: **p* <0.05, ***p* <0.01, ****p* <0.001. Phadiatop is not a natural source of allergens, but a mixture of several different inhaled allergens. More than 90% of common allergens in the air are embedded in the same CAP and determined by CAP system.

Table S3. Sex difference of positive rates (%)

| **Sources of allergens** | **Number of sIgE-positive patients (%)** | | **χ2** | ***p* value** |
| --- | --- | --- | --- | --- |
| **Male** | **Female** |
| *Dermatophagoides pteronyssinus* | 393(22.37%) | 182(16.95%) | 12.105 | 0.001** |
| *Dermatophagoides farinae* | 424(24.08%) | 208(19.35%) | 8.617 | 0.003** |
| Dog dander | 137(8.83%) | 74(7.65%) | 1.071 | 0.301 |
| Cat dander | 120(7.82%) | 69(7.18%) | 0.343 | 0.558 |
| *Blattella germanica* | 65(4.15%) | 30(3.07%) | 1.947 | 0.163 |
| Mixed dust mite | 506(27.40%) | 250(21.80%) | 11.756 | 0.001** |
| Mixed molds | 926(24.93%) | 521(21.53%) | 9.418 | 0.002** |
| Mixed animal fur | 274(14.80%) | 153(13.29%) | 1.326 | 0.249 |
| Mixed grasses | 372(19.91%) | 148(12.75%) | 25.861 | <0.001*** |
| Mixed trees | 323(17.31%) | 128(11.03%) | 22.21 | <0.001*** |
| Phadiatop | 279(14.32%) | 187(13.83%) | 0.154 | 0.695 |
| Egg white | 1761(34.37%) | 1045(30.48%) | 14.097 | <0.001*** |
| Milk | 1632(32.03%) | 1020(29.82%) | 4.622 | 0.032* |
| Wheat | 1024(19.75%) | 452(12.93%) | 68.735 | <0.001*** |
| Soybean | 417(7.88%) | 159(4.47%) | 40.584 | <0.001*** |
| Peanut | 631(11.98%) | 253(7.13%) | 55.177 | <0.001*** |
| Crab | 52(1.72%) | 24(1.19%) | 2.27 | 0.132 |
| Shrimp | 120(2.47%) | 71(2.18%) | 0.736 | 0.391 |
| Sesame | 494(16.49%) | 208(10.43%) | 36.416 | <0.001*** |
| Mixed food | 2408(48.03%) | 1420(42.00%) | 29.561 | <0.001*** |

**Notes:** Chi-square test: **p* <0.05, ***p* <0.01, ****p* <0.001. Phadiatop is not a natural source of allergens, but a mixture of several different inhaled allergens. More than 90% of common allergens in the air are embedded in the same CAP and determined by CAP system.

Table S4. Seasons difference of positive rates (%)

| **Sources of allergens A2:G23** | **Number of sIgE-positive patients(%)** | | | | **χ2** | ***p* value** |
| --- | --- | --- | --- | --- | --- | --- |
| **Spring** | **Summer** | **Autumn** | **Winter** |
| *Dermatophagoides pteronyssinus* | 73(14.90%) | 193(18.74%) | 172(23.27%) | 137(23.95%) | 19.138 | 0.000** |
| *Dermatophagoides farinae* | 79(16.09%) | 204(19.86%) | 197(26.41%) | 152(26.57%) | 27.753 | 0.000** |
| Dog dander | 26(6.36%) | 60(6.08%) | 67(9.41%) | 58(14.11%) | 27.569 | 0.000** |
| Cat dander | 24(5.97%) | 49(5.01%) | 70(9.92%) | 46(11.25%) | 24.121 | 0.000** |
| *Blattella germanica* | 13(3.21%) | 36(3.64%) | 33(4.59%) | 13(3.04%) | 2.373 | 0.499 |
| Mixed dust mite | 104(20.16%) | 262(21.98%) | 247(29.33%) | 143(32.21%) | 32.68 | 0.000** |
| Mixed molds | 244(16.61%) | 486(23.79%) | 425(33.78%) | 292(21.41%) | 115.878 | 0.000** |
| Mixed animal fur | 70(13.73%) | 132(11.24%) | 133(15.52%) | 92(19.96%) | 22.247 | 0.000** |
| Mixed grasses | 63(12.21%) | 128(10.79%) | 237(27.53%) | 92(19.74%) | 109.956 | 0.000** |
| Mixed trees | 49(9.51%) | 135(11.34%) | 188(21.91%) | 79(17.10%) | 58.731 | 0.000** |
| Phadiatop | 116(11.74%) | 146(16.35%) | 91(20.59%) | 113(11.55%) | 28.836 | 0.000** |
| Egg white | 830(37.34%) | 760(28.40%) | 461(29.01%) | 755(36.60%) | 68.081 | 0.000** |
| Milk | 716(32.30%) | 796(29.89%) | 476(29.99%) | 664(32.41%) | 5.822 | 0.121 |
| Wheat | 371(16.45%) | 362(13.32%) | 299(18.31%) | 444(21.40%) | 56.919 | 0.000** |
| Soybean | 112(4.85%) | 143(5.14%) | 169(10.34%) | 152(7.14%) | 59.692 | 0.000** |
| Peanut | 164(7.12%) | 238(8.61%) | 248(15.14%) | 234(11.11%) | 77.86 | 0.000** |
| Crab | 8(0.67%) | 28(1.68%) | 23(2.15%) | 17(1.52%) | 9.077 | 0.028* |
| Shrimp | 34(1.58%) | 57(2.28%) | 49(3.38%) | 51(2.54%) | 12.628 | 0.006** |
| Sesame | 142(11.93%) | 185(11.27%) | 204(19.35%) | 171(15.48%) | 41.332 | 0.000** |
| Mixed food | 1000(45.56%) | 1070(40.68%) | 749(47.77%) | 1009(50.40%) | 47.182 | 0.000** |

**Notes:** Chi-square test: **p* <0.05, ***p* <0.01. Phadiatop is not a natural source of allergens, but a mixture of several different inhaled allergens. More than 90% of common allergens in the air are embedded in the same CAP and determined by CAP system.
